# Supplementary material for: Insights into the application of cerium dioxide nanoparticle-modified cobalt phosphide as an efficient electrocatalyst for high-performance lithium–sulfur batteries
Source: Royal Society of Chemistry journal article supplement (doi:10.1039/d4qi01349b), 2024-01-01
Supplement: d4qi01349b1.pdf [file d4qi01349b1.pdf]

## Supporting Information

### Insight into the effect of cerium dioxide nanoparticle modified cobalt phosphide as an efficient electrocatalyst for high-performance lithium-sulfur battery

Xiaofei Wang<sup>a\*</sup>, Ganfan Zhang<sup>a</sup>, Yue Li<sup>a</sup>, Yuanting Wu<sup>a</sup>, Wei Luo<sup>b\*</sup>,

<sup>a</sup> School of Materials Science and Engineering, Shaanxi Key Laboratory of Green Preparation and Functionalization for Inorganic Materials, Shaanxi University of Science and Technology, Xi'an, 710021, PR China

<sup>b</sup> Department of Electronic Engineering, School of Electronic Information and Electrical Engineering, Shanghai Jiao Tong University, Shanghai 200240, PR China

Email: wangxiaof@sust.edu.cn (X.F. Wang), [luoweicxy@163.com](mailto:luoweicxy@163.com) (W. Luo)

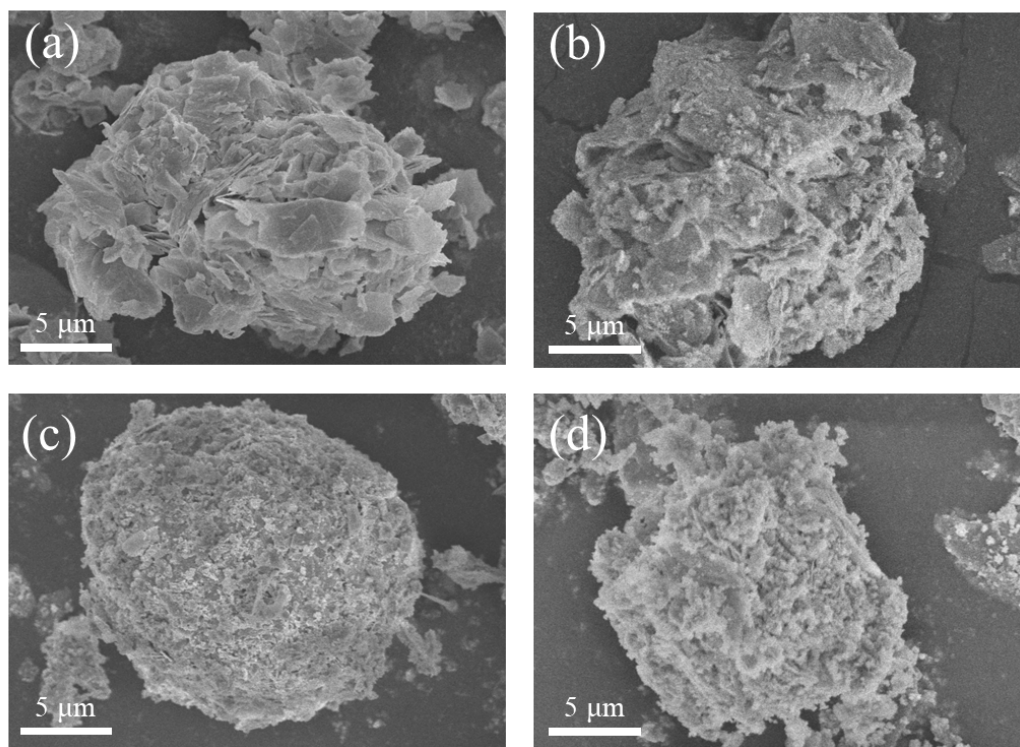

**Fig**

**Figure S1** SEM images of the (a)  $\text{Co(OH)}_2$ , (b)  $\text{Co(OH)}_2/\text{CeO}_2$ -5, (c)  $\text{Co(OH)}_2/\text{CeO}_2$ -10, (d)  $\text{Co(OH)}_2/\text{CeO}_2$ -15.

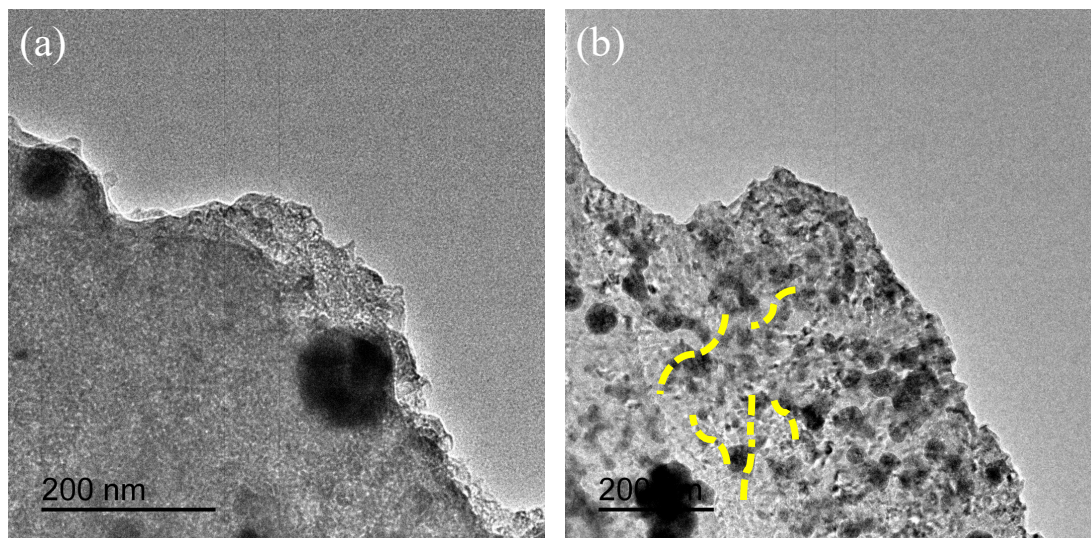

**Figure S2** SEM images of the (a) CoP/CeO<sub>2</sub>-0, (b) CoP/CeO<sub>2</sub>-5.

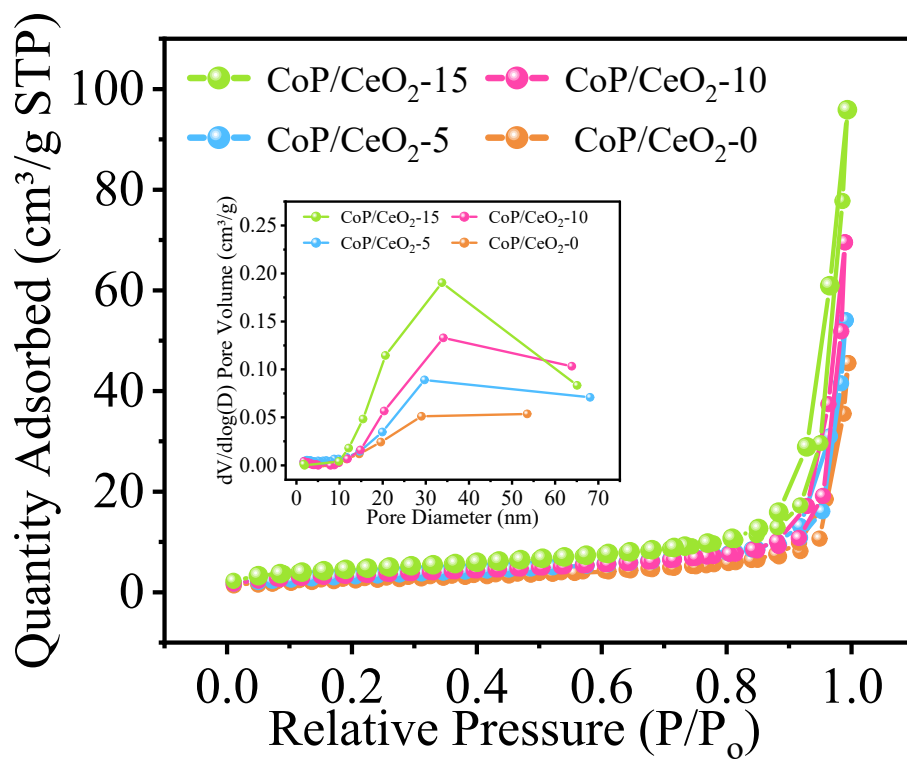

**Figure S3** N<sub>2</sub> adsorption/desorption curves and pore size distribution curves.

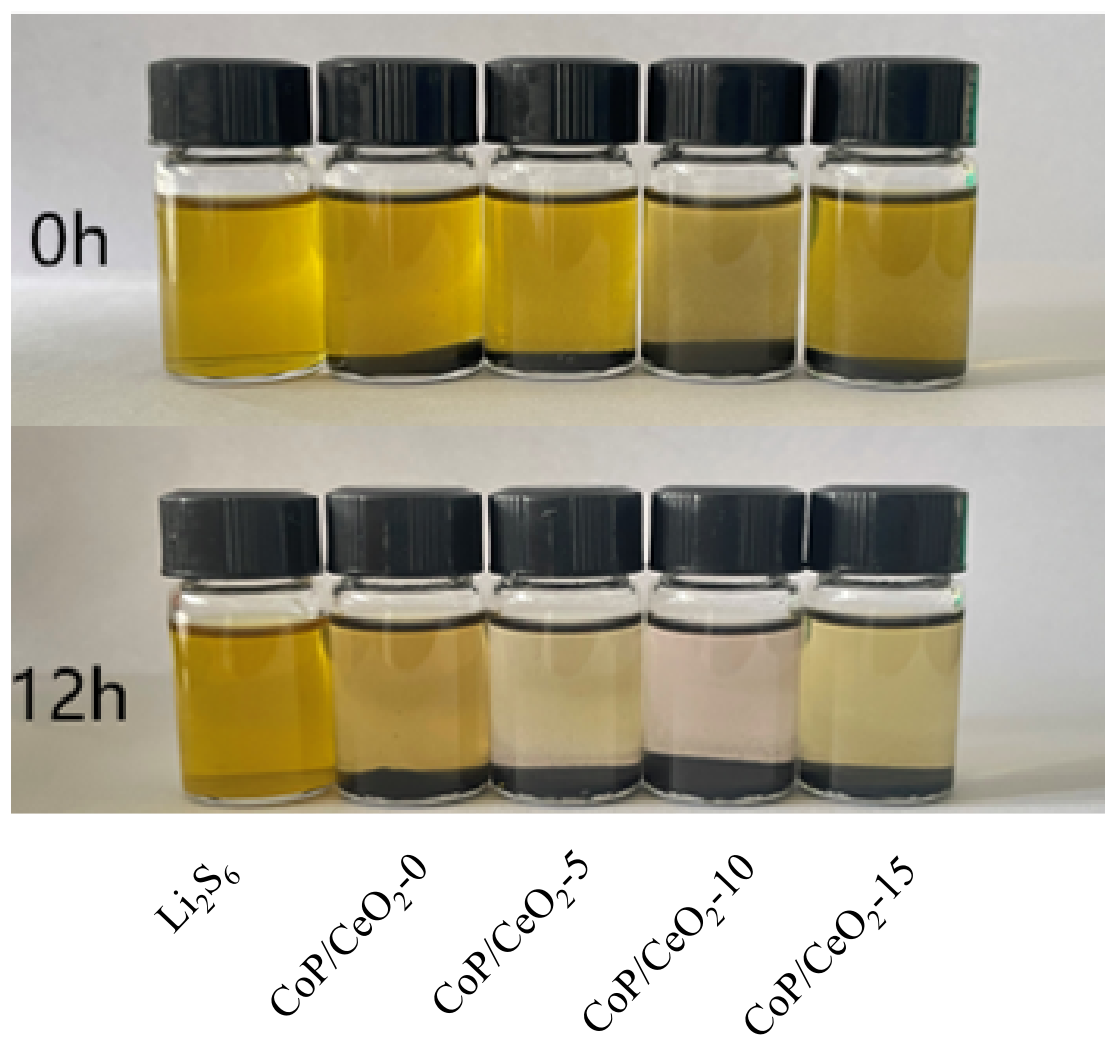

**Figure S4** The digital image of  $\text{Li}_2\text{S}_6$  solutions before and after adding  $\text{CoP/CeO}_2-0$ ,  $\text{CoP/CeO}_2-5$ ,  $\text{CoP/CeO}_2-10$  and  $\text{CoP/CeO}_2-15$ .

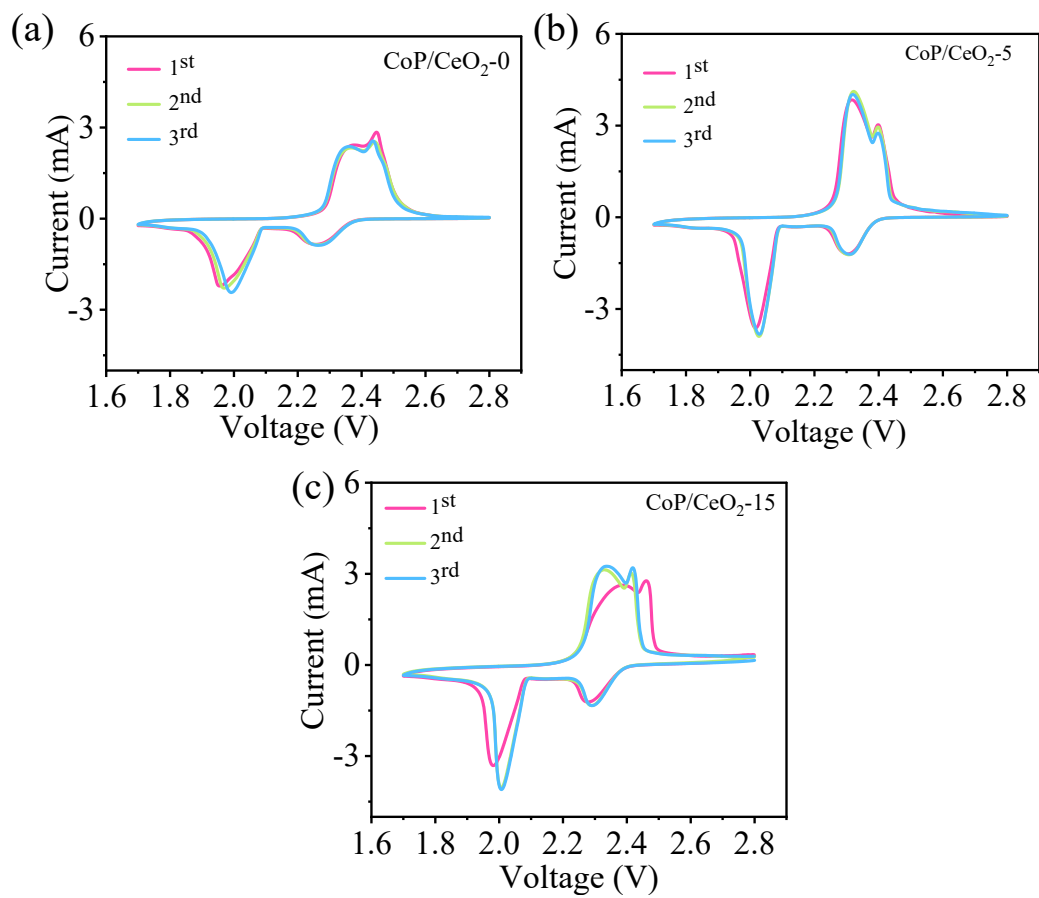

**Figure S5** CV curves of Li-S batteries with CoP/CeO<sub>2</sub>-0 (a), CoP/CeO<sub>2</sub>-5 (b) and CoP/CeO<sub>2</sub>-15 (c) modified separators at 0.1 mV s<sup>-1</sup>.

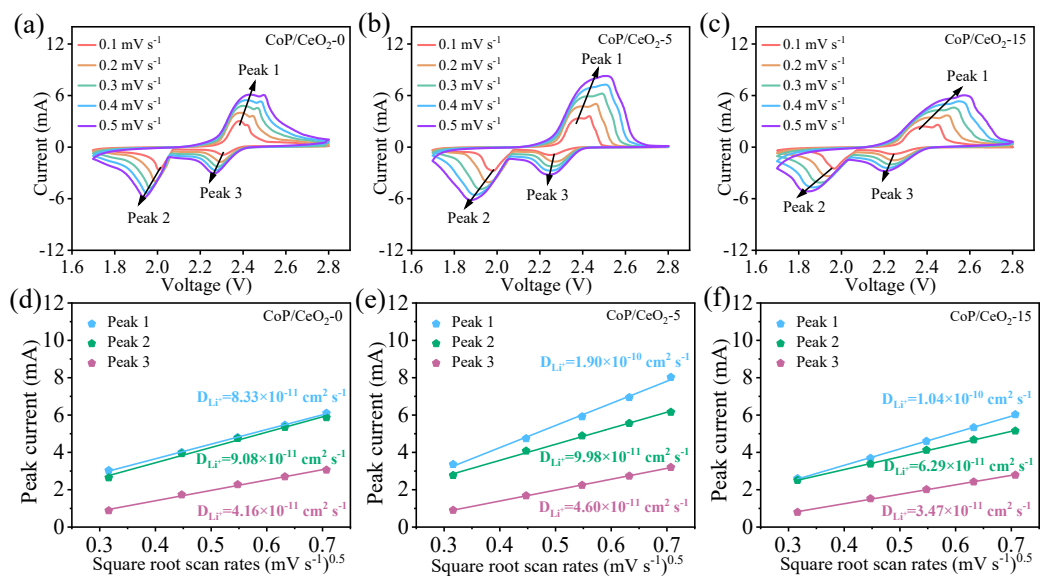

**Figure S6** CV curves of Li-S batteries with CoP/CeO<sub>2</sub>-0 (a), CoP/CeO<sub>2</sub>-5 (b) and CoP/CeO<sub>2</sub>-15 (c) modified separators at various scan rates. The corresponding linear fitting of the peak currents with the square root of the scan rate of Li-S batteries with CoP/CeO<sub>2</sub>-0 (d), CoP/CeO<sub>2</sub>-5 (e) and CoP/CeO<sub>2</sub>-15 (f) modified separators.

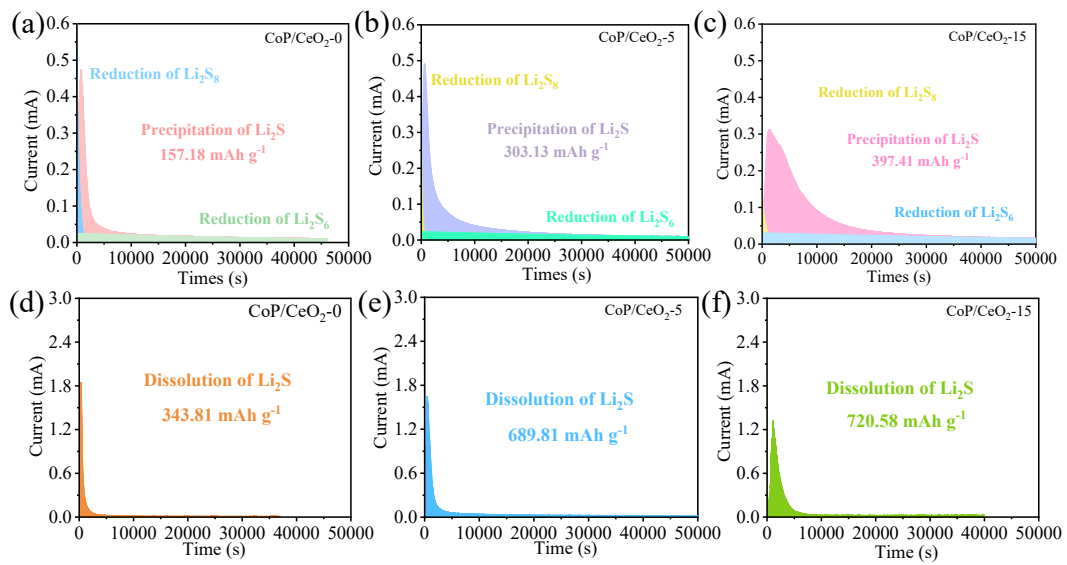

**Figure S7**  $\text{Li}_2\text{S}$  nucleation and dissolution curves of the battery using  $\text{CoP/CeO}_2-0$  (a, d),  $\text{CoP/CeO}_2-5$  (b, e) and  $\text{CoP/CeO}_2-15$  (c, f).

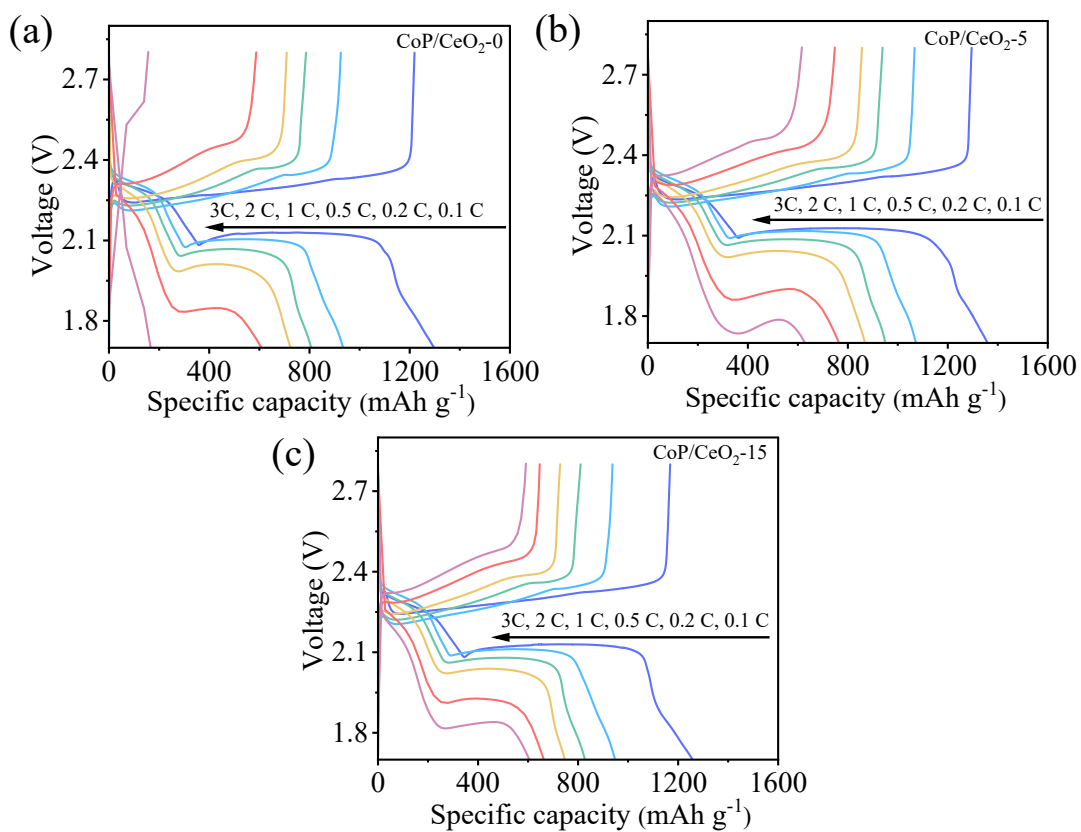

**Figure S8** Discharge-charge curves of Li-S batteries with CoP/CeO<sub>2</sub>-0 (a), CoP/CeO<sub>2</sub>-5 (b) and CoP/CeO<sub>2</sub>-15 (c) modified separators at various rates.



**Table S1** The electrochemical performance of reported Li-S batteries containing CeO<sub>2</sub> and/or CoP.

| Material                                            | Sulfur loading (mg cm <sup>-2</sup> ) | Initial capacities (mAh g <sup>-1</sup> ) at various rate (C)       | Cycle number | Capacity decay (per cycle) | Ref.             |
|-----------------------------------------------------|---------------------------------------|---------------------------------------------------------------------|--------------|----------------------------|------------------|
| CMK-3@CeO <sub>2</sub>                              | 2.8                                   | 1248 mAh g <sup>-1</sup> at 0.5 C<br>1000 mAh g <sup>-1</sup> at 1C | 200<br>800   | 0.106%<br>0.039%           | [1]              |
| P-CeO <sub>2</sub>                                  | 1.0                                   | 620 mAh g <sup>-1</sup> at 1C                                       | 500          | 0.100%                     | [2]              |
| CC@CeO <sub>2</sub> @Li <sub>2</sub> S <sub>6</sub> | 1.0                                   | 1311 mAh g <sup>-1</sup> at 0.2 C                                   | 100          | 0.050%                     | [3]              |
| CeO <sub>2</sub> @G                                 | 1.2                                   | 610 mAh g <sup>-1</sup> at 2 C                                      | 1000         | 0.024%                     | [4]              |
| CeO <sub>2</sub> @CNTs/S                            | 1.0                                   | 1437.6 mAh g <sup>-1</sup> at 0.1 C                                 | 300          | 0.170%                     | [5]              |
| Li <sub>2</sub> S-CGA/CeO <sub>2</sub>              | 2.0                                   | 591 mAh g <sup>-1</sup> at 1 C                                      | 200          | 0.050%                     | [6]              |
| CeO <sub>2-x</sub> @CNF                             | 1.0                                   | 1017 mAh g <sup>-1</sup> at 2 C                                     | 800          | 0.046%                     | [7]              |
| CoP-Co <sub>3</sub> S <sub>4</sub>                  | 1.1                                   | 1516.9 mAh g <sup>-1</sup> at 0.2 C                                 | 100          | 0.51%                      | [8]              |
| h-O-CoP-NCG                                         | 4.2                                   | 834 mAh g <sup>-1</sup> at 0.5 C                                    | 300          | 0.048%                     | [9]              |
| <b>CoP/CeO<sub>2</sub></b>                          | 2.0                                   | 1214.5 mAh g <sup>-1</sup> at 0.2 C                                 | 500          | 0.0972%                    | <b>This work</b> |
|                                                     | 4.0                                   | 1041.6 mAh g <sup>-1</sup> at 0.2 C                                 | 100          | 0.01%                      |                  |

### Supplemental References

[1] Runlan Li, Qian Liu, Wenbo Yue, CeO<sub>2</sub> nanoparticles decorated CMK-3 as high-performance sulfur host for Li-S batteries, *Journal of Alloys and Compounds* 928 (2022) 167179, <https://doi.org/10.1016/j.jallcom.2022.167179>.

[2] Xuefeng Tao, Zhao Yang, Menghao Cheng, Rui Yan, Fan Chen, Sujiao Cao, Shuang Li, Tian Ma, Chong Cheng, Wei Yang, Phosphorus modulated porous CeO<sub>2</sub> nanocrystallines for accelerated polysulfide catalysis in advanced Li-S batteries, *Journal of Materials Science & Technology* 131 (2022) 212-220, <https://doi.org/10.1016/j.jmst.2022.06.004>.

- [3] Zhen Wei, Junhao Li, Yifan Wang, Ruigang Wang, High-performance Li-S batteries enabled by polysulfide-infiltrated free-standing 3D carbon cloth with CeO<sub>2</sub> nanorods decoration, *Electrochimica Acta* 388 (2021) 138645, <https://doi.org/10.1016/j.electacta.2021.138645>.
- [4] Pu Cheng, Pengqian Guo, Kai Sun, Yonggang Zhao, Dequan Liu, Deyan He, CeO<sub>2</sub> decorated graphene as separator modification material for capture and boost conversion of polysulfide in lithium-sulfur batteries, *Journal of Membrane Science* 619 (2021) 118780, <https://doi.org/10.1016/j.memsci.2020.118780>.
- [5] Fengshuai Zhu, Mingang Zhang, Ling Wang, Xiangyu Cao, Synthesis and electrochemical performance of CeO<sub>2</sub>@CNTs/S composite cathode for Li-S batteries, *Journal of Solid State Electrochemistry* 25 (2021) 2625-2637, <https://doi.org/10.1007/s10008-021-05033-6>.
- [6] Hao Yu, Xi Zhou, Peng Zeng, Changmeng Guo, Hong Liu, Xiaowei Guo, Baobao Chang, Manfang Chen, Jincang Su, Xianyou Wang, 3D Cellulose Graphene Aerogel with Self-Redox CeO<sub>2</sub> as Li<sub>2</sub>S Host for High-Performance Li-S Battery, *Energy Technol.* 10 (2022) 2200616, <https://doi.org/10.1002/ente.202200616>.
- [7] Qiao Hou, Kuandi Wang, Wenji Zheng, Xiangcun Li, Miao Yu, Helong Jiang, Yan Dai, Fangyi Chu, Xiaobin Jiang, Ding Zhu, Gaohong He, Eliminating bandgap between Cu-CeO<sub>2-x</sub> heterointerface enabling fast electron transfer and redox reaction in Li-S batteries, *Energy Storage Mater.* 63 (2023) 102983, <https://doi.org/10.1016/j.ensm.2023.102983>.
- [8] Donghong Duan, Kaixin Chen, Chongzhi Xing, Xiaoqiang Wang, Xianxian Zhou, Shibin Liu, Enhancing the polysulfide redox conversion by a heterogeneous CoP-Co<sub>3</sub>S<sub>4</sub> electrocatalyst for Li-S batteries, *J. Alloy. Compd.* 961 (2023) 171099, <https://doi.org/10.1016/j.jallcom.2023.171099>.
- [9] Xiaojun Zhao, Tianqi Gao, Yan Yuan, Zhao Fang, Hollow slightly oxidized CoP confined into flyover-type carbon skeleton with multiple channels as an effective adsorption-catalysis matrix for robust Li-S batteries, *Electrochim. Acta* 422 (2022) 140512, <https://doi.org/10.1016/j.electacta.2022.140512>.
